# Supplementary material for: Exploring the mode of action of ebselen in Trypanosoma brucei hexokinase inhibition
Source: PubMed Central journal article supplement — Int J Parasitol Drugs Drug Resist. 2013 Sep 12;3:154–60. doi: 10.1016/j.ijpddr.2013.08.002 (PMC3862409; doi:10.1016/j.ijpddr.2013.08.002), 2013-09-12
Supplement: mmc1.pdf [file mmc1.pdf]

| Accession | Description                | Score                       | Coverage | # Proteins | # Unique Peptides | # Peptides               | # PSMs                         | # AAs  | MW [kDa] | calc. pI |            |          |          |                    |  |
|-----------|----------------------------|-----------------------------|----------|------------|-------------------|--------------------------|--------------------------------|--------|----------|----------|------------|----------|----------|--------------------|--|
| 46402201  | Jim Morris Clemson [human] | 1516.92                     | 76.43    | 1          | 30                | 30                       | 459                            | 471    | 51.4     | 8.82     |            |          |          |                    |  |
|           | A3                         | Sequence                    | # PSMs   | # Proteins | # Protein Groups  | Protein Group Accessions | Modifications                  | ΔCn    | XCorr    | Charge   | MH+ [Da]   | ΔM [ppm] | RT [min] | # Missed Cleavages |  |
| High      |                            | AAQLSASFcaAPLVK             | 18       | 1          |                   | 1.46402201               | C9(Cys->Dha); C10(Dioxidation) | 0.0000 | 4.00     | 2        | 1506.74639 | -10.48   | 94.46    | 0                  |  |
| High      |                            | ATAIDGSVFEK                 | 7        | 1          |                   | 1.46402201               |                                | 0.0000 | 3.54     | 2        | 1250.66509 | 1.86     | 86.79    | 0                  |  |
| High      |                            | ATAIDGSVFEKIPSPR            | 1        | 1          |                   | 1.46402201               |                                | 0.0000 | 2.53     | 3        | 1851.00199 | 0.44     | 100.99   | 1                  |  |
| High      |                            | DGSGGAIFISAMVNDK            | 26       | 1          |                   | 1.46402201               |                                | 0.0000 | 4.79     | 2        | 1751.86406 | 0.39     | 109.29   | 0                  |  |
| High      |                            | DVAMAALTNQFTmSVESMR         | 28       | 1          |                   | 1.46402201               | M13(Oxidation)                 | 0.0000 | 3.12     | 3        | 2117.97013 | 1.69     | 111.95   | 0                  |  |
| High      |                            | DVAMAALTNQFTmSVESMR         | 21       | 1          |                   | 1.46402201               |                                | 0.0000 | 5.72     | 2        | 2101.97588 | 2.02     | 113.32   | 0                  |  |
| High      |                            | EGAVVDSSTSAFK               | 11       | 1          |                   | 1.46402201               |                                | 0.0000 | 3.54     | 2        | 1297.62847 | 1.05     | 67.24    | 0                  |  |
| High      |                            | FAGmISADR                   | 25       | 1          |                   | 1.46402201               | M4(Oxidation)                  | 0.0000 | 3.07     | 2        | 983.46269  | 1.16     | 61.49    | 0                  |  |
| High      |                            | FAGmISADR                   | 6        | 1          |                   | 1.46402201               |                                | 0.0000 | 2.92     | 2        | 967.46697  | 0.34     | 72.40    | 0                  |  |
| High      |                            | FAGmISADRMpGLQFTR           | 1        | 1          |                   | 1.46402201               | M4(Oxidation); M10(Oxidation)  | 0.0000 | 2.67     | 3        | 1929.93436 | 1.70     | 80.52    | 1                  |  |
| High      |                            | FAGmISADRMpGLQFTR           | 1        | 1          |                   | 1.46402201               | M4(Oxidation)                  | 0.0000 | 2.63     | 3        | 1913.93698 | 0.43     | 90.14    | 1                  |  |
| High      |                            | FDLIDDASLNK                 | 4        | 1          |                   | 1.46402201               |                                | 0.0000 | 4.19     | 2        | 1365.65544 | 1.55     | 90.59    | 0                  |  |
| High      |                            | FDLIDDASLNKGGQALEK          | 7        | 1          |                   | 1.46402201               |                                | 0.0000 | 5.41     | 2        | 2120.05351 | 1.32     | 89.46    | 1                  |  |
| High      |                            | FVLPTTKFDLIDDASLNKGGQALEK   | 6        | 1          |                   | 1.46402201               |                                | 0.0000 | 4.29     | 4        | 2906.50722 | -2.58    | 98.95    | 2                  |  |
| High      |                            | GSALTPINmESGNFDSK           | 28       | 1          |                   | 1.46402201               | M9(Oxidation)                  | 0.0000 | 3.78     | 2        | 1783.82146 | 2.61     | 75.06    | 0                  |  |
| High      |                            | GSALTPINmESGNFDSK           | 18       | 1          |                   | 1.46402201               |                                | 0.0000 | 3.88     | 2        | 1767.82451 | 1.49     | 85.85    | 0                  |  |
| High      |                            | GVQGNVDVIALQAFAFR           | 22       | 1          |                   | 1.46402201               |                                | 0.0000 | 5.37     | 2        | 1728.94011 | 0.50     | 127.50   | 0                  |  |
| High      |                            | ILGPEcDVR                   | 6        | 1          |                   | 1.46402201               | C6(Trioxidation)               | 0.0000 | 2.74     | 2        | 1049.49370 | 0.43     | 72.67    | 0                  |  |
| High      |                            | LNNILEHISIQGNDGETVR         | 6        | 1          |                   | 1.46402201               |                                | 0.0000 | 5.92     | 3        | 2122.09201 | 1.51     | 90.03    | 0                  |  |
| High      |                            | mISGMYLGEIAR                | 8        | 1          |                   | 1.46402201               | M1(Oxidation); M5(Oxidation)   | 0.0000 | 3.59     | 2        | 1372.66216 | 1.56     | 82.40    | 0                  |  |
| High      |                            | mISGMYLGEIAR                | 10       | 1          |                   | 1.46402201               | M1(Oxidation)                  | 0.0000 | 3.83     | 2        | 1356.66557 | 0.35     | 90.53    | 0                  |  |
| High      |                            | MISGMYLGEIAR                | 9        | 1          |                   | 1.46402201               |                                | 0.0000 | 4.35     | 2        | 1340.67107 | 0.66     | 94.70    | 0                  |  |
| High      |                            | mPGLQFTR                    | 5        | 1          |                   | 1.46402201               | M1(Oxidation)                  | 0.0000 | 2.49     | 2        | 965.48802  | 0.68     | 73.05    | 0                  |  |
| High      |                            | mPGLQFTR                    | 7        | 1          |                   | 1.46402201               |                                | 0.0000 | 2.76     | 2        | 949.49254  | 0.09     | 82.79    | 0                  |  |
| High      |                            | QImTYLLYEMVEGLEGR           | 4        | 1          |                   | 1.46402201               | M3(Oxidation)                  | 0.0000 | 4.95     | 2        | 2061.00493 | 0.83     | 125.87   | 0                  |  |
| High      |                            | QImTYLLYEMVEGLEGR           | 15       | 1          |                   | 1.46402201               |                                | 0.0000 | 5.52     | 2        | 2045.00957 | 0.62     | 137.92   | 0                  |  |
| High      |                            | RDVAMAALTNQFTmSVESMR        | 2        | 1          |                   | 1.46402201               |                                | 0.0000 | 3.64     | 3        | 2258.07730 | 2.02     | 106.10   | 1                  |  |
| High      |                            | RLNILEHISIQGNDGETVR         | 18       | 1          |                   | 1.46402201               |                                | 0.0000 | 5.18     | 3        | 2278.19583 | 2.59     | 87.99    | 1                  |  |
| High      |                            | RVIVHSSINcLPAALQ TALG NR    | 2        | 1          |                   | 1.46402201               | C11(Dioxidation)               | 0.0000 | 4.23     | 3        | 2478.36435 | 1.33     | 109.62   | 1                  |  |
| High      |                            | RVIVHSSINcLPAALQ TALG NR    | 5        | 1          |                   | 1.46402201               | C11(Delta:S(-1)Se(1))          | 0.0000 | 5.12     | 3        | 2494.35678 | 16.48    | 111.33   | 1                  |  |
| High      |                            | RVIVHSSINcLPAALQ TALG NR    | 5        | 1          |                   | 1.46402201               | C11(Trioxidation)              | 0.0000 | 3.91     | 3        | 2494.35807 | 0.84     | 111.98   | 1                  |  |
| High      |                            | RVLQDNINR                   | 7        | 1          |                   | 1.46402201               |                                | 0.0000 | 3.50     | 2        | 1127.63005 | 1.79     | 55.58    | 1                  |  |
| High      |                            | TVPLGFTSFVPEQTK             | 22       | 1          |                   | 1.46402201               |                                | 0.0000 | 4.08     | 2        | 1797.94353 | 0.72     | 109.70   | 0                  |  |
| High      |                            | VACKEGAVDSSTSAFK            | 15       | 1          |                   | 1.46402201               | C3(Dioxidation)                | 0.0000 | 3.80     | 3        | 1730.83042 | 2.19     | 72.05    | 1                  |  |
| High      |                            | VACKEGAVDSSTSAFK            | 15       | 1          |                   | 1.46402201               | C3(Trioxidation)               | 0.0000 | 5.54     | 2        | 1746.82573 | 2.40     | 73.06    | 1                  |  |
| High      |                            | VACKEGAVDSSTSAFK            | 7        | 1          |                   | 1.46402201               | C3(Delta:S(-1)Se(1))           | 0.0000 | 5.19     | 2        | 1746.82292 | 23.86    | 72.43    | 1                  |  |
| High      |                            | VACKEGAVDSSTSAFKIPK         | 2        | 1          |                   | 1.46402201               | C3(Dioxidation)                | 0.0000 | 3.07     | 3        | 2069.06046 | 0.98     | 80.37    | 2                  |  |
| High      |                            | VACKEGAVDSSTSAFKIPK         | 2        | 1          |                   | 1.46402201               | C3(Delta:S(-1)Se(1))           | 0.0000 | 4.49     | 3        | 2085.05307 | 19.19    | 81.13    | 2                  |  |
| High      |                            | VACKEGAVDSSTSAFKIPK         | 2        | 1          |                   | 1.46402201               | C3(Trioxidation)               | 0.0000 | 4.49     | 3        | 2085.05307 | -0.14    | 81.13    | 2                  |  |
| High      |                            | VcGVdVQSIEDLR               | 3        | 1          |                   | 1.46402201               | C2(Dioxidation)                | 0.0000 | 2.32     | 2        | 1464.70036 | 0.28     | 91.71    | 0                  |  |
| High      |                            | VcGVdVQSIEDLR               | 3        | 1          |                   | 1.46402201               | C2(Trioxidation)               | 0.0000 | 3.41     | 2        | 1480.69670 | 1.23     | 92.21    | 0                  |  |
| High      |                            | VIVHSSINcLPAALQ TALG NR     | 6        | 1          |                   | 1.46402201               | C10(Dioxidation)               | 0.0000 | 4.06     | 3        | 2322.26053 | 0.26     | 114.16   | 0                  |  |
| High      |                            | VIVHSSINcLPAALQ TALG NR     | 3        | 1          |                   | 1.46402201               | C10(Trioxidation)              | 0.0000 | 5.28     | 3        | 2338.25772 | 1.23     | 116.34   | 0                  |  |
| High      |                            | VIVHSSINcLPAALQ TALG NR     | 3        | 1          |                   | 1.46402201               | C10(Delta:S(-1)Se(1))          | 0.0205 | 5.25     | 3        | 2338.25699 | 18.15    | 116.38   | 0                  |  |
| High      |                            | VNVVALcNDVTGLLISHYFKDPEVQVG | 4        | 1          |                   | 1.46402201               | C7(Dioxidation); C3(Cys->Dha)  | 0.0000 | 3.29     | 5        | 5608.81269 | -2.57    | 120.71   | 2                  |  |
| High      |                            | YALEGNATLDFDIASNVK          | 20       | 1          |                   | 1.46402201               |                                | 0.0000 | 6.09     | 2        | 2088.03081 | 1.11     | 122.56   | 0                  |  |
| High      |                            | YALEGNATLDFDIASNVK          | 13       | 1          |                   | 1.46402201               |                                | 0.0000 | 4.28     | 3        | 2216.12766 | 1.89     | 117.66   | 1                  |  |
