# Supplementary material for: Exploring the mode of action of ebselen in Trypanosoma brucei hexokinase inhibition
Source: PubMed Central journal article supplement — Int J Parasitol Drugs Drug Resist. 2013 Sep 12;3:154–60. doi: 10.1016/j.ijpddr.2013.08.002 (PMC3862409; doi:10.1016/j.ijpddr.2013.08.002), 2013-09-12
Supplement: mmc2.pdf [file mmc2.pdf]

| Accession | Description                | Score   | Coverage   | # Proteins       | # Unique Peptides        | # Peptides                     | # PSMs | # AAs | MW [kDa] | calc. pI   |          |          |                    |  |  |
|-----------|----------------------------|---------|------------|------------------|--------------------------|--------------------------------|--------|-------|----------|------------|----------|----------|--------------------|--|--|
| 46402201  | Jim Morris Clemson [human] | 1410.56 | 66.67      | 1                | 25                       | 25                             | 428    | 471   | 51.4     | 8.82       |          |          |                    |  |  |
| A3        | Sequence                   | # PSMs  | # Proteins | # Protein Groups | Protein Group Accessions | Modifications                  | ΔCn    | XCorr | Charge   | MH+ [Da]   | ΔM [ppm] | RT [min] | # Missed Cleavages |  |  |
| High      | AAQLSASfcaAPLVK            | 6       | 1          | 1                | 1.46402201               | C9(Cys->Dha); C10(Dioxidation) | 0.0000 | 4.22  | 2        | 1506.74455 | -11.69   | 95.13    | 0                  |  |  |
| High      | ATAIDGSVFEK                | 9       | 1          | 1                | 1.46402201               |                                | 0.0000 | 3.74  | 2        | 1250.66338 | 0.49     | 86.86    | 0                  |  |  |
| High      | DSGIGGAIFISAMVNDK          | 29      | 1          | 1                | 1.46402201               |                                | 0.0000 | 4.71  | 2        | 1751.86418 | 0.46     | 110.36   | 0                  |  |  |
| High      | DVAMAALNQFTMSVESMR         | 42      | 1          | 1                | 1.46402201               | M13(Oxidation)                 | 0.0000 | 4.92  | 2        | 2117.96904 | 1.18     | 112.52   | 0                  |  |  |
| High      | DVAMAALNQFTMSVESMR         | 16      | 1          | 1                | 1.46402201               |                                | 0.0000 | 6.01  | 3        | 2101.97129 | -0.16    | 114.69   | 0                  |  |  |
| High      | EGAVVDSSTSAFK              | 17      | 1          | 1                | 1.46402201               |                                | 0.0000 | 3.57  | 2        | 1297.62651 | -0.45    | 67.85    | 0                  |  |  |
| High      | FAGmISADR                  | 25      | 1          | 1                | 1.46402201               | M4(Oxidation)                  | 0.0000 | 3.07  | 2        | 983.46153  | -0.02    | 62.05    | 0                  |  |  |
| High      | FAGmISADR                  | 10      | 1          | 1                | 1.46402201               |                                | 0.0000 | 3.21  | 2        | 967.46733  | 0.71     | 72.73    | 0                  |  |  |
| High      | FAGmISADRmPGLQFTR          | 3       | 1          | 1                | 1.46402201               | M4(Oxidation); M10(Oxidation)  | 0.0000 | 2.65  | 3        | 1929.93106 | -0.01    | 80.60    | 1                  |  |  |
| High      | FDLIDDDASLNK               | 3       | 1          | 1                | 1.46402201               |                                | 0.0000 | 4.32  | 2        | 1365.65398 | 0.48     | 90.81    | 0                  |  |  |
| High      | FDLIDDDASLNKGGQALEK        | 7       | 1          | 1                | 1.46402201               |                                | 0.0000 | 3.58  | 3        | 2120.05332 | 1.23     | 89.82    | 1                  |  |  |
| High      | FVLPPTKFDLIDDDASLNK        | 3       | 1          | 1                | 1.46402201               |                                | 0.0000 | 4.19  | 3        | 2152.11600 | -0.62    | 102.44   | 1                  |  |  |
| High      | FVLPPTKFDLIDDDASLNKGGQALEK | 4       | 1          | 1                | 1.46402201               |                                | 0.0000 | 3.76  | 4        | 2906.51723 | 0.86     | 99.23    | 2                  |  |  |
| High      | GSALTPINmESGNFDSK          | 24      | 1          | 1                | 1.46402201               | M9(Oxidation)                  | 0.0000 | 4.13  | 2        | 1783.81731 | 0.29     | 76.85    | 0                  |  |  |
| High      | GSALTPINmESGNFDSK          | 13      | 1          | 1                | 1.46402201               |                                | 0.0000 | 3.78  | 2        | 1767.82317 | 0.73     | 84.77    | 0                  |  |  |
| High      | GVQGNVDVIALQLAAAFGR        | 34      | 1          | 1                | 1.46402201               |                                | 0.0000 | 5.47  | 2        | 1728.94109 | 1.07     | 128.11   | 0                  |  |  |
| High      | LNNILEHISIQGNDGETVR        | 7       | 1          | 1                | 1.46402201               |                                | 0.0000 | 6.03  | 3        | 2122.09018 | 0.65     | 90.88    | 0                  |  |  |
| High      | mISGmYLGEIAR               | 8       | 1          | 1                | 1.46402201               | M1(Oxidation); M5(Oxidation)   | 0.0000 | 3.71  | 2        | 1372.66057 | 0.41     | 82.17    | 0                  |  |  |
| High      | MISGmYLGEIAR               | 29      | 1          | 1                | 1.46402201               | M5(Oxidation)                  | 0.0000 | 2.51  | 2        | 1356.66594 | 0.62     | 87.38    | 0                  |  |  |
| High      | MISGmYLGEIAR               | 9       | 1          | 1                | 1.46402201               |                                | 0.0000 | 4.38  | 2        | 1340.67046 | 0.21     | 95.02    | 0                  |  |  |
| High      | mLPSVYK                    | 2       | 1          | 1                | 1.46402201               | M1(Oxidation)                  | 0.0000 | 2.03  | 2        | 1016.51354 | 1.36     | 74.98    | 0                  |  |  |
| High      | mPGLQFTR                   | 2       | 1          | 1                | 1.46402201               | M1(Oxidation)                  | 0.0000 | 2.13  | 2        | 965.48888  | 1.57     | 75.00    | 0                  |  |  |
| High      | mPGLQFTR                   | 10      | 1          | 1                | 1.46402201               |                                | 0.0000 | 2.51  | 2        | 949.49248  | 0.03     | 82.66    | 0                  |  |  |
| High      | QIMTYLLEMVEGLEGR           | 18      | 1          | 1                | 1.46402201               | M3(Oxidation)                  | 0.0000 | 4.75  | 2        | 2061.00786 | 2.25     | 126.91   | 0                  |  |  |
| High      | QIMTYLLEMVEGLEGR           | 10      | 1          | 1                | 1.46402201               |                                | 0.0000 | 5.54  | 2        | 2045.00774 | -0.28    | 141.93   | 0                  |  |  |
| High      | RLNILEHISIQGNDGETVR        | 15      | 1          | 1                | 1.46402201               |                                | 0.0000 | 5.21  | 3        | 2278.19126 | 0.58     | 88.65    | 0                  |  |  |
| High      | RVLQDNINR                  | 2       | 1          | 1                | 1.46402201               |                                | 0.0000 | 3.59  | 2        | 1127.63030 | 2.01     | 56.69    | 1                  |  |  |
| High      | TVPLGFTSFPEVQTK            | 26      | 1          | 1                | 1.46402201               |                                | 0.0000 | 3.87  | 2        | 1797.94231 | 0.04     | 110.76   | 0                  |  |  |
| High      | VACKEGAVDSSSTSAFK          | 3       | 1          | 1                | 1.46402201               | C3(Cys->Dha)                   | 0.0000 | 3.06  | 3        | 1664.84983 | 0.45     | 69.10    | 1                  |  |  |
| High      | VACKEGAVDSSSTSAFK          | 2       | 1          | 1                | 1.46402201               | C3(Dioxidation)                | 0.0000 | 2.74  | 3        | 1730.82566 | -0.56    | 72.61    | 1                  |  |  |
| High      | VACKEGAVDSSSTSAFK          | 2       | 1          | 1                | 1.46402201               | C3(Delta-S(-1)Se(1))           | 0.0000 | 4.44  | 2        | 1746.82109 | 22.81    | 73.50    | 1                  |  |  |
| High      | VACKEGAVDSSSTSAFK          | 2       | 1          | 1                | 1.46402201               | C3(Trioxidation)               | 0.0000 | 4.44  | 2        | 1746.82109 | -0.26    | 73.50    | 1                  |  |  |
| High      | VNVVALNDVTGLTSLHYFKDPEVQVG | 1       | 1          | 1                | 1.46402201               | C7(Dioxidation); C37(Cys->Dha) | 0.0000 | 3.00  | 5        | 5608.83222 | 0.92     | 124.02   | 2                  |  |  |
| High      | VNVVALNDVTGLTSLHYFKDPEVQVG | 2       | 1          | 1                | 1.46402201               |                                | 0.0000 | 3.31  | 4        | 5610.82436 | -0.11    | 125.12   | 2                  |  |  |
| High      | YALEGNATLDFDIASNVK         | 20      | 1          | 1                | 1.46402201               |                                | 0.0000 | 5.68  | 2        | 2088.02983 | 0.64     | 123.53   | 0                  |  |  |
| High      | YALEGNATLDFDIASNVK         | 13      | 1          | 1                | 1.46402201               |                                | 0.0000 | 4.48  | 3        | 2216.12766 | 1.89     | 117.03   | 1                  |  |  |
